# Supplementary material for: CD4+ helper T cells endow cDC1 with cancer-impeding functions in the human tumor micro-environment
Source: Springer Nature journal article supplement (doi:10.1038/s41467-022-35615-5), 2023-01-13
Supplement: MOESM1 [file 41467_2022_35615_MOESM1_ESM.pdf]

# **CD4<sup>+</sup> helper T cells endow cDC1 with cancer-impeding functions in the human tumor micro-environment**

Xin Lei<sup>1,2</sup>, Indu Khatri<sup>1,\$</sup>, Tom de Wit<sup>1,2,\$</sup>, Iris de Rink<sup>3</sup>, Marja Nieuwland<sup>3</sup>, Ron Kerkhoven<sup>3</sup>, Hans van Eenennaam<sup>4</sup>, Chong Sun<sup>5</sup>, Abhishek D. Garg<sup>6</sup>,  
Jannie Borst<sup>1,2,#,\*</sup> and Yanling Xiao<sup>1,2,\*</sup>

<sup>1</sup>Department of Immunology and <sup>2</sup>Oncode Institute, Leiden University Medical Center, Leiden, The Netherlands; <sup>3</sup>Genomics Facility, The Netherlands Cancer Institute, Amsterdam, The Netherlands; <sup>4</sup>Aduro Biotech Europe B.V., Oss, The Netherlands; <sup>5</sup>Immune Regulation in Cancer, German Cancer Research Center, Heidelberg, Germany and <sup>6</sup>Laboratory of Cell Stress & Immunity, Department of Cellular & Molecular Medicine, KU Leuven, Leuven, Belgium

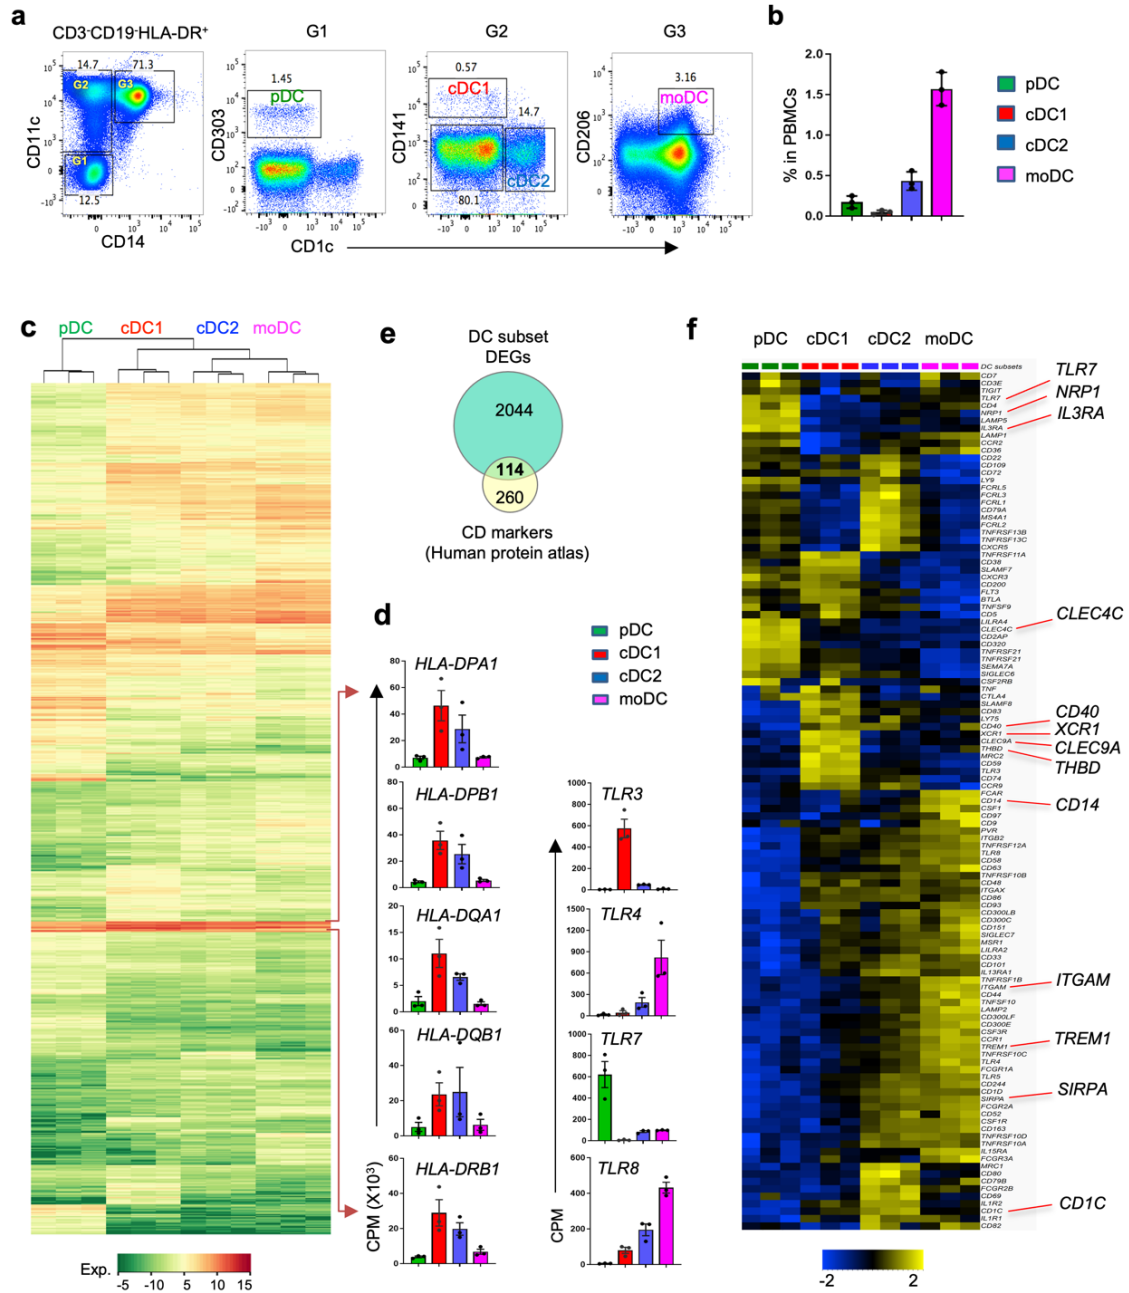

**Supplementary Figure 1. Validation of human *ex vivo* pDC, cDC1, cDC2 and moDC subsets by transcriptomics.** CD11c<sup>+</sup>CD303<sup>+</sup> pDC, CD11c<sup>+</sup>CD141<sup>+</sup> cDC1, CD11c<sup>+</sup>CD1c<sup>+</sup> cDC2 and CD11c<sup>+</sup>CD14<sup>+</sup> moDC were purified by flow cytometry from fresh PBMC of three healthy donors for bulk mRNA-sequencing. (a) Gating strategy for DC subset sorting. (b) Frequency (%) of each DC subset within total live PBMC (n=3). Data are derived from three independent biological replications (n=3) and are shown as means ± SEM. (c-h) Results of bulk mRNA-seq. Sequence reads were aligned to the Ensembl gene set *Homo sapiens* GRCh37.66. (c) Heatmap depicting 2158 differentially expressed genes (DEGs) between DC subsets (p-value < 0.01; log<sub>2</sub>-fold change > 2 or < -2). (d) Bar charts depicting mRNA expression of indicated genes in each DC subset based on read counts per million (CPM). Data are derived from three independent biological replications (n=3) and are shown as means ± SEM. (e) Venn diagram indicating that among the 2158 DEGs, 114 encoded CD markers as listed by Human Protein Atlas (out of a total of 374 CD markers). (f) Heatmap of the 114 CD markers that were differentially expressed between the DC subsets.

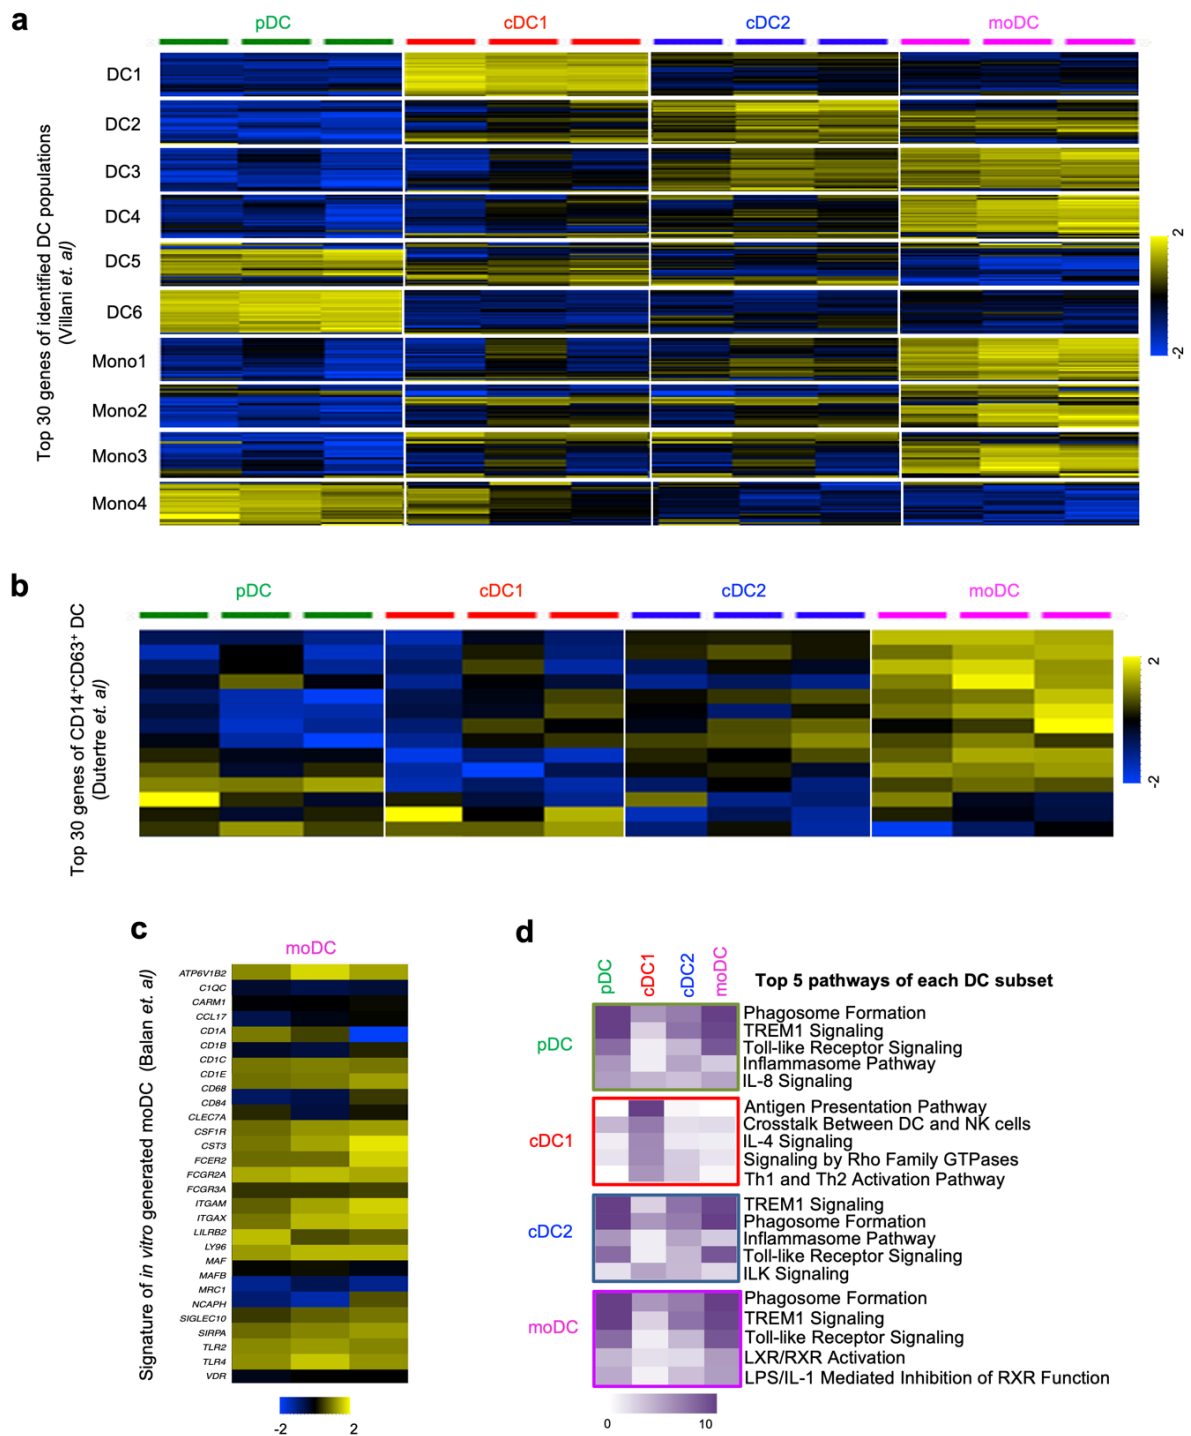

**Supplementary Figure 2. Further validation of human *ex vivo* pDC, cDC1, cDC2 and moDC subsets.**

Analysis is based on transcriptome data of DC subsets obtained as outlined in Extended Data Figure 1. (a) Heatmap of top 30 signature genes of DC and monocyte subtypes/states from single cell transcriptome data of Villani *et al.*<sup>20</sup> as expressed by our DC subsets. (b) Heatmap of top 30 signature genes of CD14<sup>+</sup>CD63<sup>+</sup> DC from single cell transcriptome data of Dutertre *et al.*<sup>21</sup> as expressed by our DC subsets. (c) Heatmap of indicated signature genes of *in vitro* generated moDC from bulk transcriptome data of Balan *et al.*<sup>22</sup> as expressed by our *ex vivo* moDC. (d) Top five upregulated pathways in each DC subset as derived from Ingenuity Pathway Analysis (IPA).

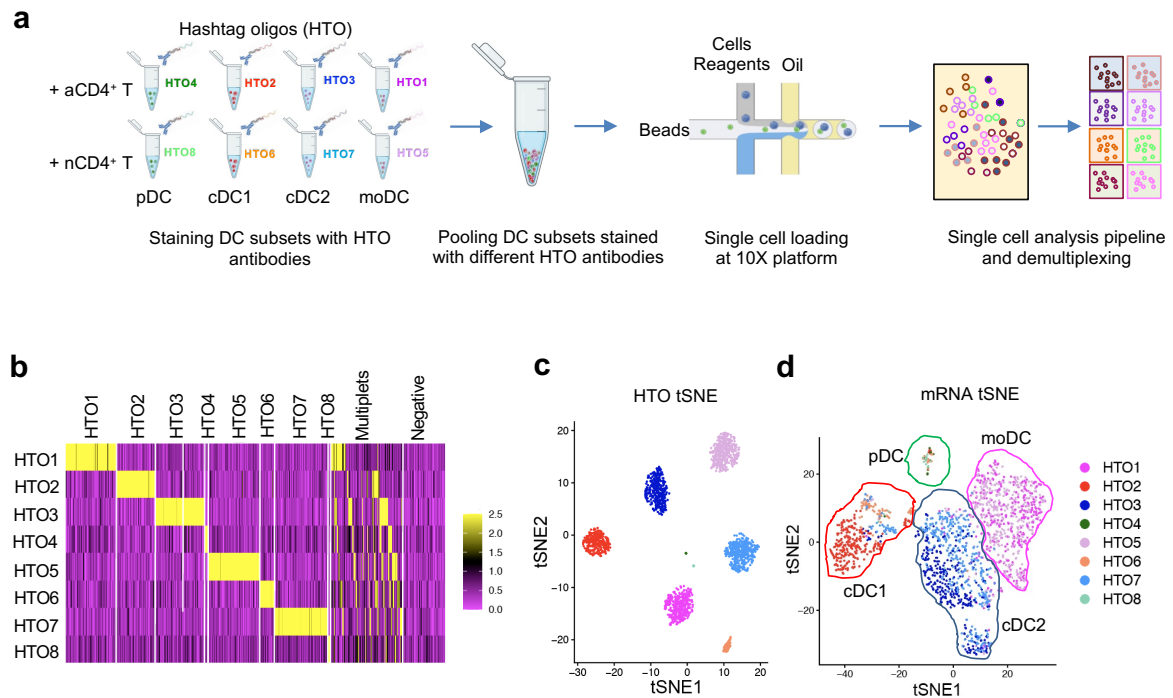

**Supplementary Figure 3. Detecting the human DC response to CD4<sup>+</sup> T-cell help by Hashtag scRNA-seq.** *Ex vivo* pDC, cDC1, cDC2 and moDC were cultured with activated- or naive CD4<sup>+</sup> T-cells and next labeled with HTO 1-8, pooled together in equal proportion, then loaded on a 10X Genomics platform for scRNA-seq. **(a)** Illustration of experimental design for scRNA-seq. **(b)** Heatmap depicting scaled (z-scores) normalized detection of HTO. Multiplets contain more than one different HTO. Negative populations contain no HTO. **(c)** tSNE plot of the singlets based on HTO detection depicts the separation between HTO 1-8. Cells were colored based on their specific HTO labeling. **(d)** tSNE plot of CD3<sup>-</sup> DC single-cell expression profile based on top 2000 variable genes. DC subsets from conditions outlined in **(a)** are depicted in the relevant HTO color.





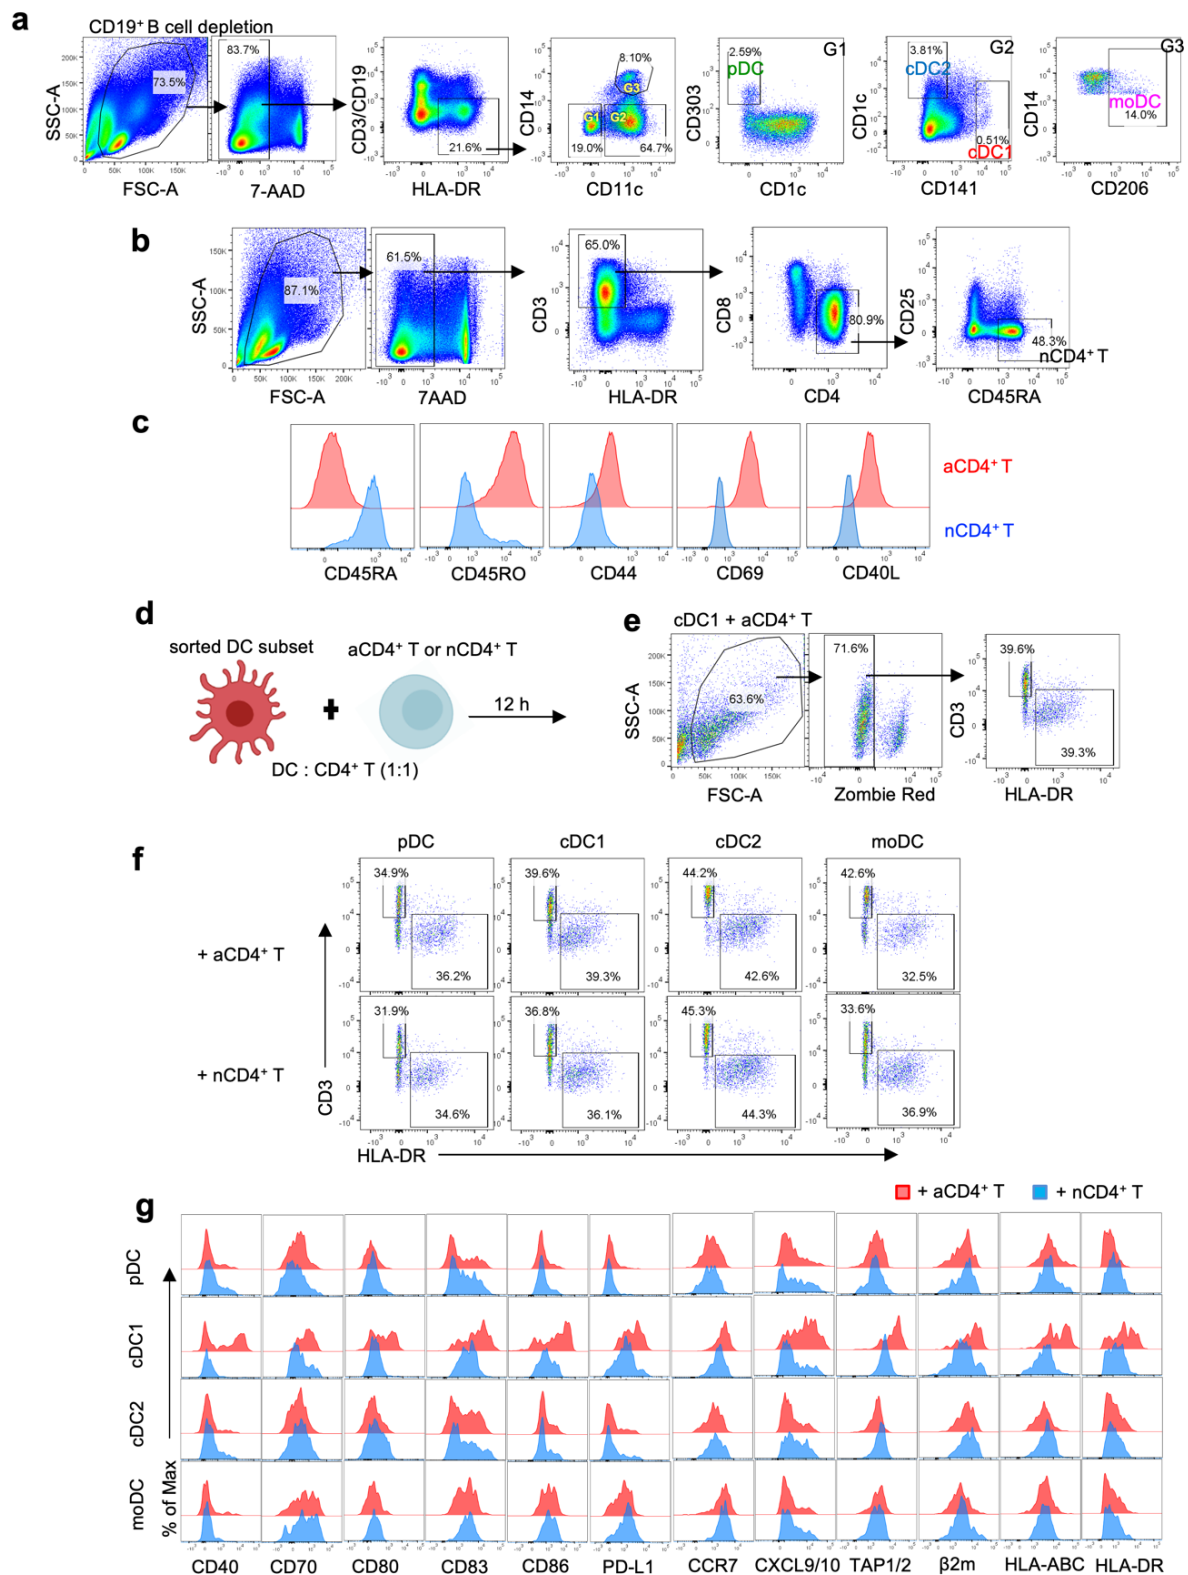

**Supplementary Figure 5. Method for validation of the human cDC1 help signature.** Key molecules of the cDC1 help signature were flow cytometrically validated after co-culturing *ex vivo* pDC, cDC1, cDC2 or moDC with activated- or naive CD4<sup>+</sup> T-cells. (**a**, **b**) Gating strategies for sorting (**a**) pDC, cDC1, cDC2 or moDC and (**b**) conventional naive CD4<sup>+</sup> T-cells from cryopreserved PBMC. (**c**) Expression (MFI) of indicated markers on activated (a)- or naive (n) CD4<sup>+</sup> T-cells. (**d**) Illustration of the DC-CD4<sup>+</sup> T-cell co-culture. (**e**) Gating strategy for flow cytometric analysis of DC after co-culture with CD4<sup>+</sup> T-cells. (**f**) Flow cytometry plots depicting pDC, cDC1, cDC2 or moDC co-cultured with activated- or naive CD4<sup>+</sup> T-cells. (**g**) Flow cytometry histograms depicting indicated markers expressed by DC under indicated conditions.

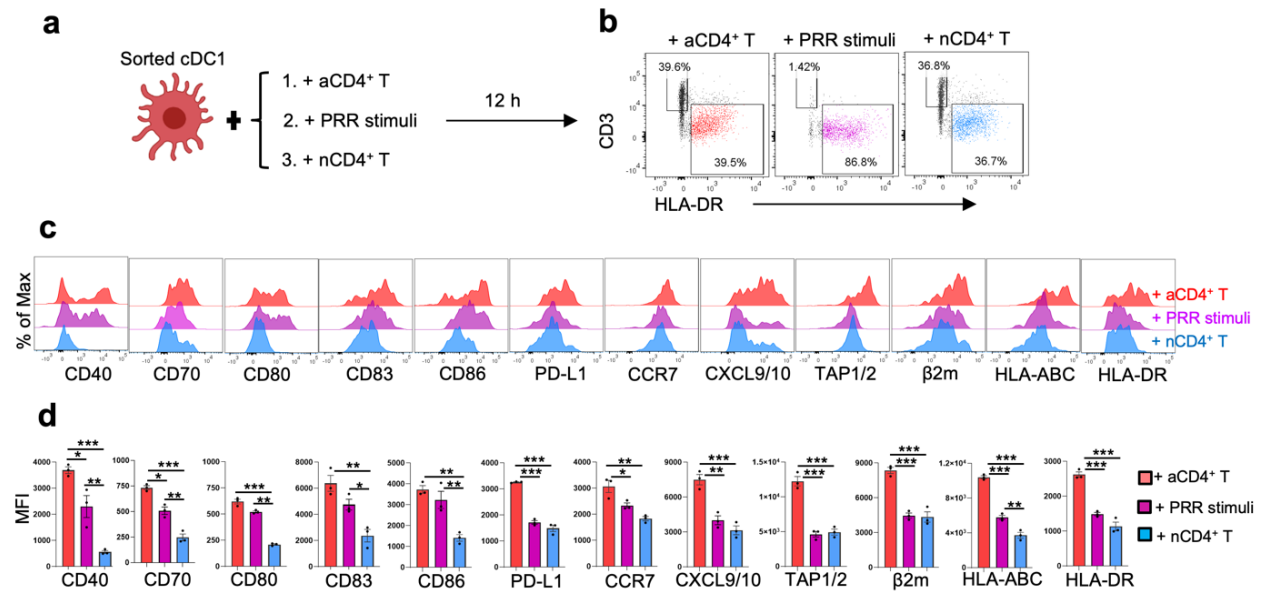

**Supplementary Figure 6. Comparison of impact of CD4<sup>+</sup> T-cell help and PRR signals on cDC1.** cDC1 were co-cultured with activated (a) or naïve (n)CD4<sup>+</sup> T-cells or a mixture of TLR3, -4, and -7/8 agonists, as specified in the Methods section. (a) Illustration of the experimental design. (b) Gating strategy for flow cytometric analysis of cDC1 after co-culture. (c) Flow cytometry histograms and (d) MFI quantifications for indicated markers expressed by cDC1 under indicated conditions. Data are pooled from three independent experiments (n=3) and are shown as means ± SEM.  $p < 0.05^*$ ,  $p < 0.01^{**}$ ,  $p < 0.001^{***}$  (two-sided one-way ANOVA). (e) Heatmap depicting the expression of transcripts defined as the gene expression signature of human *in vitro* progenitor-derived XCR1<sup>+</sup> DC responding to PRR stimuli from Balan et al.<sup>22</sup> in each of our DC subsets co-cultured with activated (a) or naïve (n) CD4<sup>+</sup> T cells.



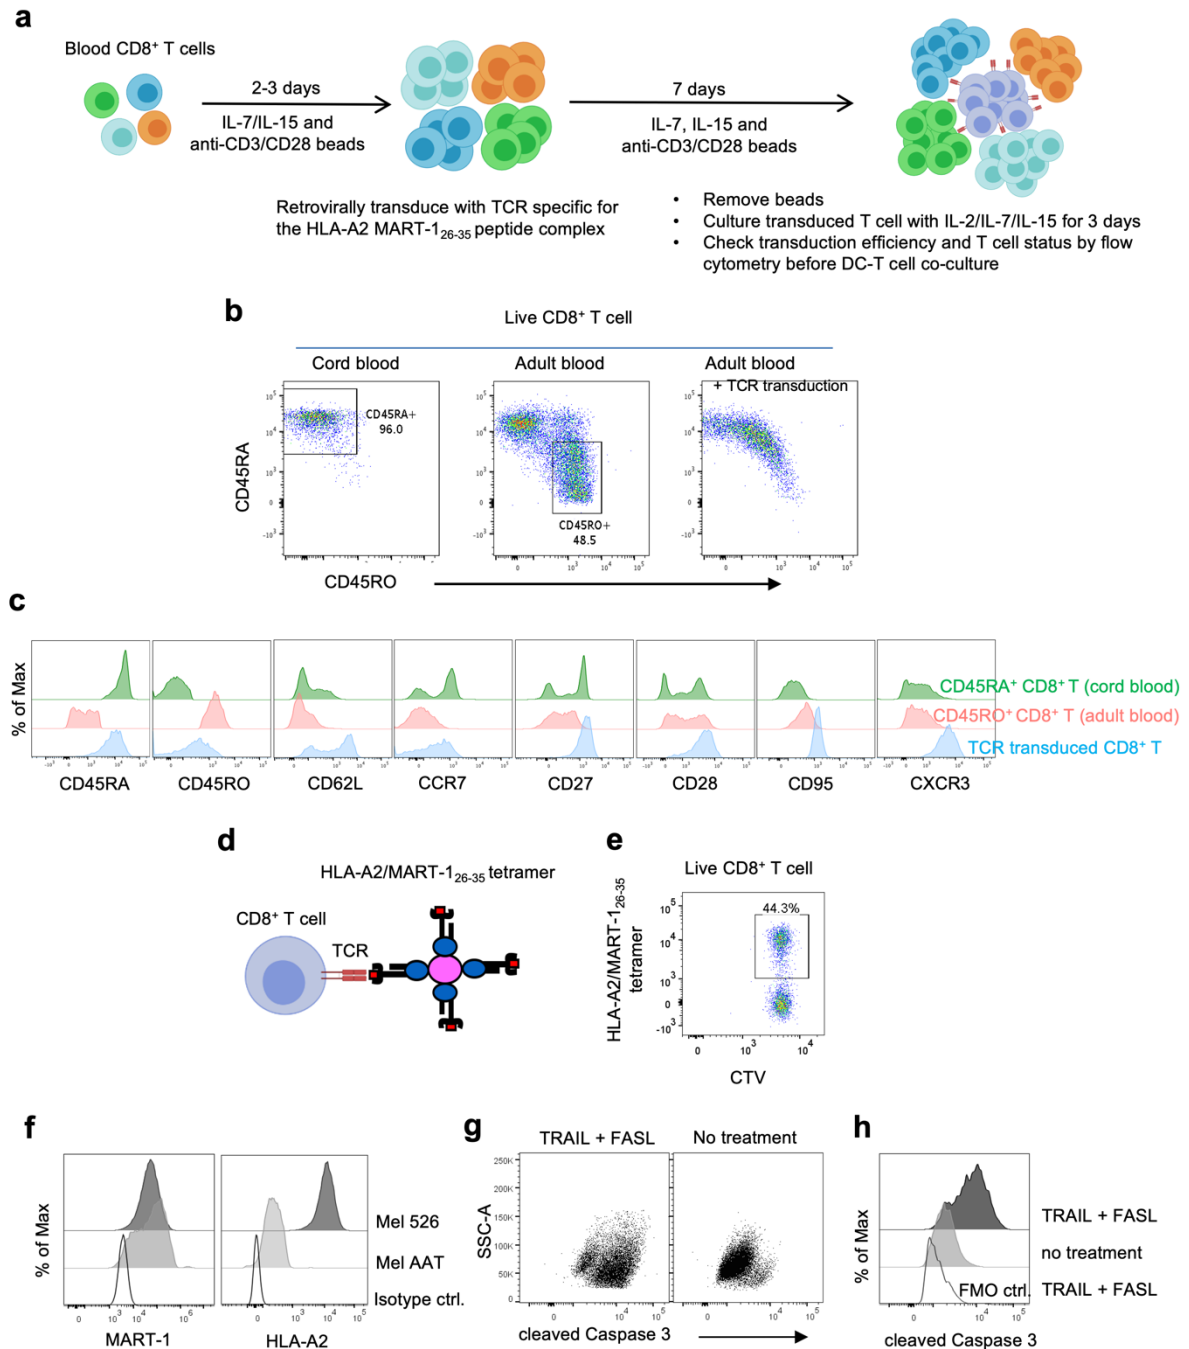

**Supplementary Figure 7. Use of MART-1<sub>26-35</sub>/HLA-A2 TCR transduced CD8<sup>+</sup> T-cells with T<sub>SCM</sub> phenotype and tumor cell-associated antigens for monitoring anti-tumor CTL response.** (a) Schematic depiction of generation of MART-1-specific CD8<sup>+</sup> T-cells from PBMC of healthy donors. (b) Gating strategies for CD45RA<sup>+</sup> and CD45RO<sup>+</sup> CD8<sup>+</sup> T-cells from cord blood and adult blood respectively. (c) Expression of indicated markers identifying T<sub>SCM</sub> phenotype<sup>26</sup> of TCR transduced CD8<sup>+</sup> T-cells at day 2-3 after resting. CD45RA<sup>+</sup> CD8<sup>+</sup> naive T-cells (cord blood) and CD45RO<sup>+</sup> CD8<sup>+</sup> activated T-cells (adult blood) were used as controls. (d) Schematic depiction of tumor antigen-specific CD8<sup>+</sup> T-cell detection with HLA-A2/MART-1<sub>26-35</sub> tetramer. (e) Flow cytometry plot depicting CTV and tetramer staining. (f) Histograms depict in MFI the intracellular expression of MART-1 (left) and surface expression of HLA-A2 (right) by Mel 526 and Mel AAT cells. (g, h) Flow cytometry plots (g) and histogram (h) depict in MFI the intracellular expression of cleaved Caspase 3 by TRAIL/FASL treated Mel 526 cells, indicating apoptotic cell death.

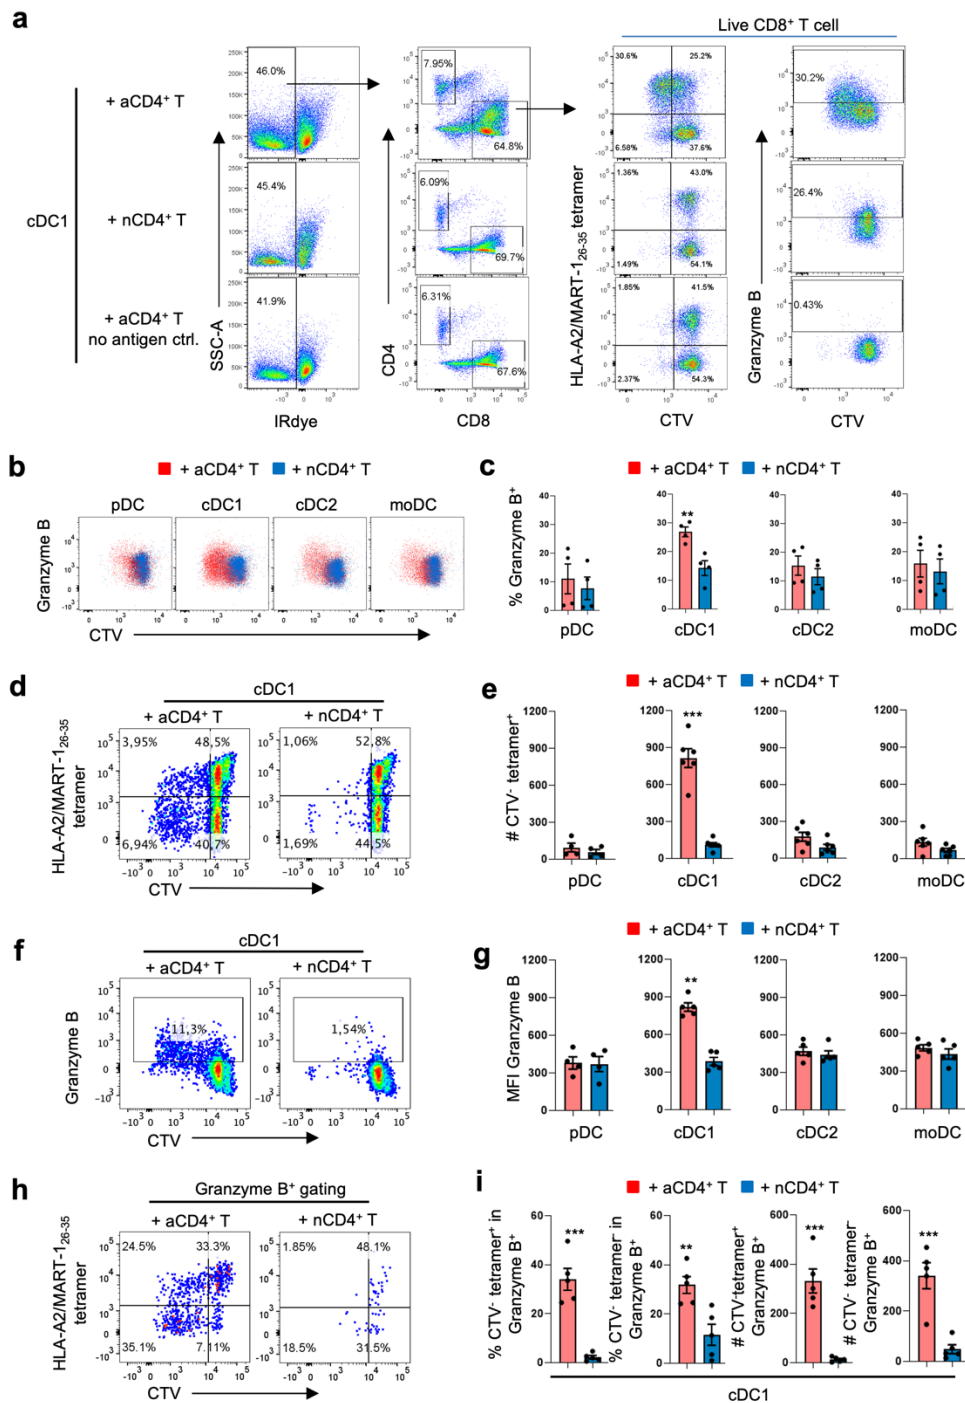

**Supplementary Figure 8. Methodology for detecting CTL responses against tumor antigens in the *in vitro* priming system.** pDC, cDC1, cDC2 and moDC were co-cultured with activated- (a) or naïve (n) CD4<sup>+</sup> T-cells and compared in their ability to cross-prime CD8<sup>+</sup> T-cells after loading with MART-1<sub>15-40</sub> long peptide or Mel 526 cell debris. (a) Gating strategies for detecting a CD8<sup>+</sup> T-cell response in our *in vitro* priming system based on CTV dilution (proliferation) and intracellular Granzyme B staining (CTL differentiation). (b, c) Response to MART-1<sub>15-40</sub> long peptide. (b) Flow cytometry plots depicting proliferation and Granzyme B expression by responding CD8<sup>+</sup> T-cells. (c) Percentage (%) of Granzyme B<sup>+</sup> cells among CD8<sup>+</sup> T-cells. (d-g) Response to Mel 526 cell debris. Flow cytometry plots depicting (d) proliferation of CD8<sup>+</sup> T-cells based on CTV dilution and (f) CTL differentiation based on Granzyme B staining. (e) Number (#) of live MART-1-specific CTV-CD8<sup>+</sup> T-cells. (g) Granzyme B expression (MFI) by CD8<sup>+</sup> T-cells. (h) Flow cytometry plots depicting proliferation of Granzyme B<sup>+</sup> CD8<sup>+</sup> T-cells based on CTV dilution. (i) Quantification of percentage (%) and number (#) of MART-1-specific (tetramer<sup>+</sup>) CTV<sup>-</sup> and non-MART-1-specific (tetramer<sup>-</sup>) CTV<sup>-</sup> CD8<sup>+</sup> T-cells within Granzyme B<sup>+</sup> cell gating. Data are pooled from four independent experiments (n=4) in (c and i), six independent experiments (n=6) in (e) and five independent experiments (n=5) in (g) and are shown as means ± SEM. Each experiment was performed with technical duplicates. p<0.05\*, p<0.01\*\*, p<0.001\*\*\* (two-sided Mann Whitney test).

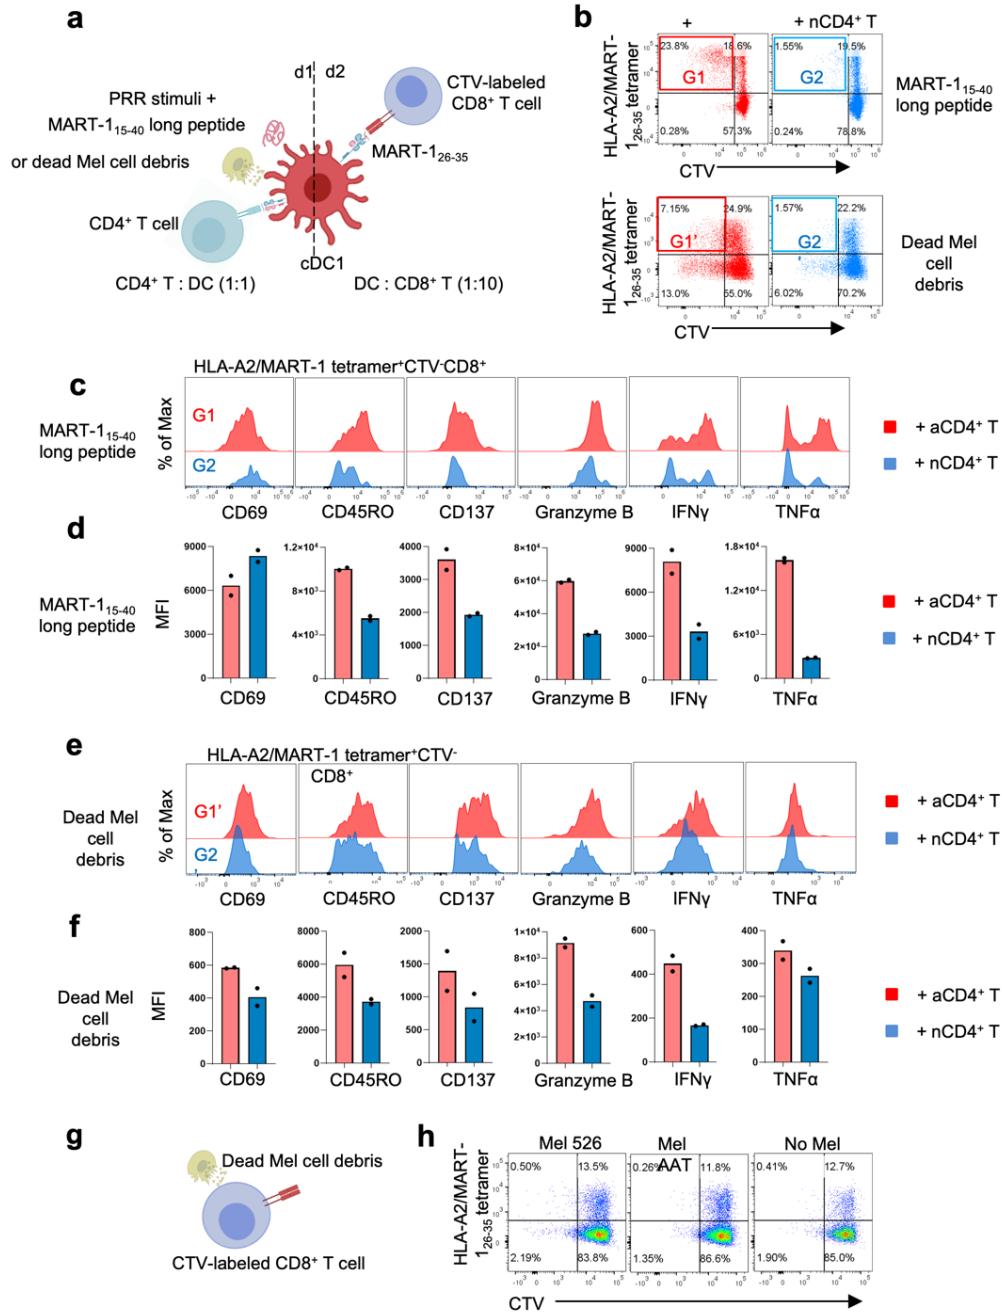

**Supplementary Figure 9. Impact of CD4<sup>+</sup> T-cell help on effector differentiation of CD8<sup>+</sup> T-cells.** (a) Sorted cDC1 were incubated with activated (a)- or naïve (n)- CD4<sup>+</sup> T-cells and entered into the priming system with MART-1<sub>15-40</sub> long peptide or dead Mel AAT cell debris as antigen source. (b) Flow cytometry plots depicting the MART-1-specific CD8<sup>+</sup> T-cell proliferation based on CTV dilution in response to MART-1 long peptide (upper panel) or dead Mel cell debris (lower panel). (c) Flow cytometry histograms and (d) MFI quantifications for indicated markers expressed by MART-1-specific (tetramer<sup>+</sup>) proliferating (CTV<sup>-</sup>) CD8<sup>+</sup> T-cells in response to MART-1<sub>15-40</sub> long peptide under indicated conditions. (e) Flow cytometry histograms and (f) MFI quantifications for indicated markers expressed by MART-1-specific (tetramer<sup>+</sup>) proliferating (CTV<sup>-</sup>) CD8<sup>+</sup> T-cells in response to dead Mel cell debris under indicated conditions. (h) Flow cytometry plots depicting the MART-1-specific CD8<sup>+</sup> T-cell proliferation based on CTV dilution. Data are pooled from two independent experiments (n=2) in (d, f). (g-h) CTV-labeled CD8<sup>+</sup> T-cells expressing the MART-1<sub>26-35</sub>/HLA-A2-specific TCR were directly co-cultured with dead Mel cell debris without the presence of DC or CD4<sup>+</sup> T-cells. (g) Schematic depiction of the co-culture. (h) Primary flow cytometry data representative of two independent experiments (n=2).

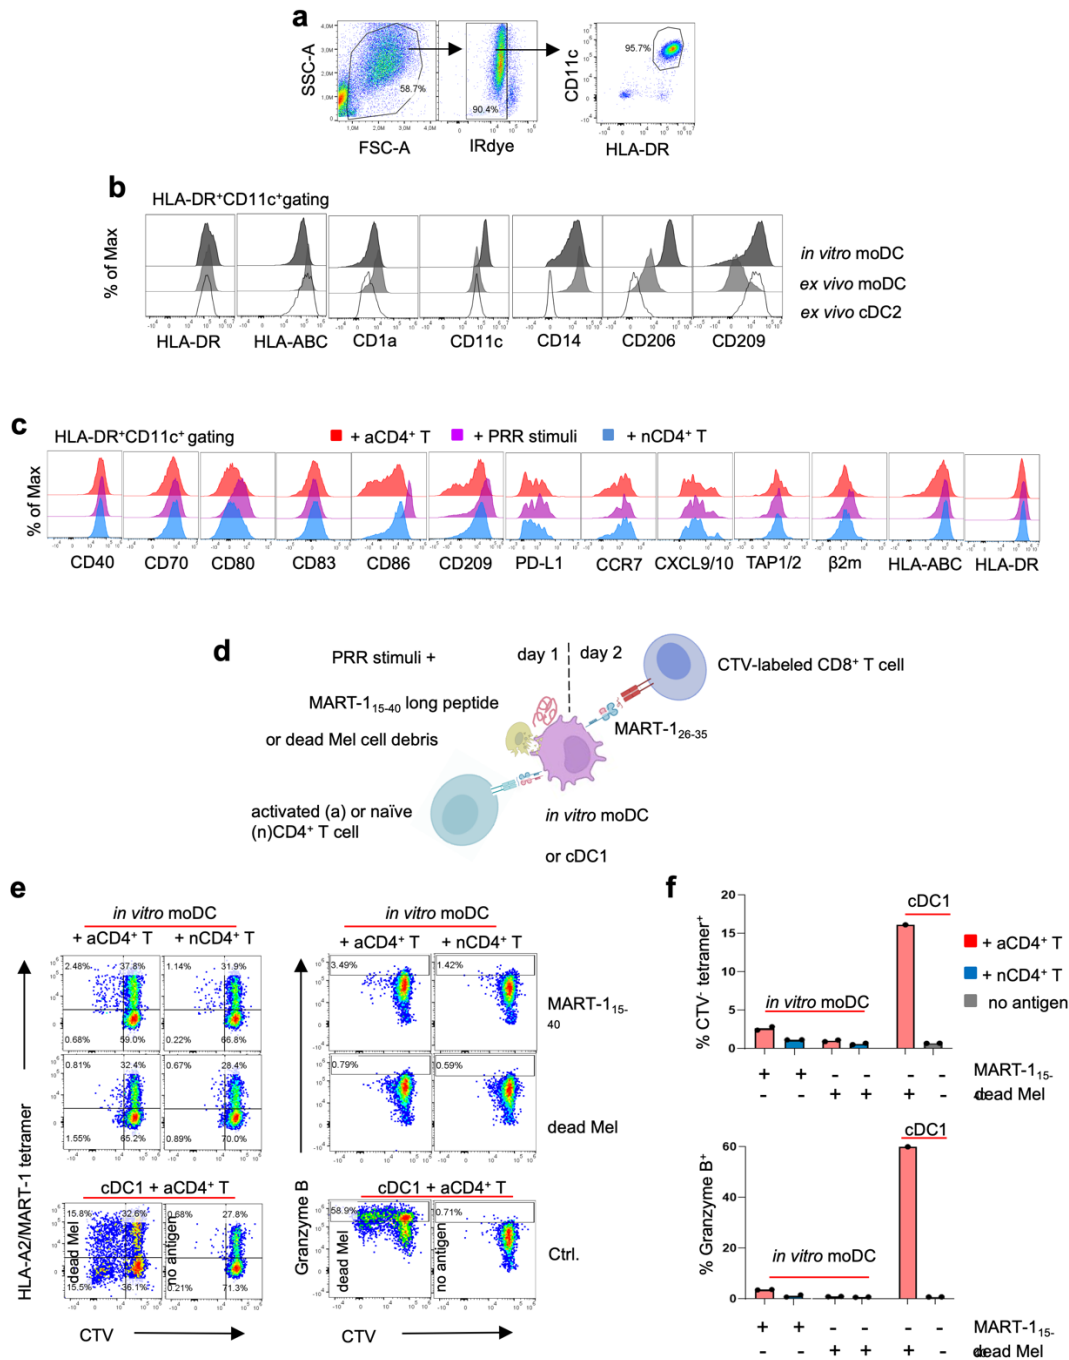

### Supplementary Figure. 10. *In vitro* generated moDC do not evidently respond to CD4<sup>+</sup> T cell help.

Monocytes were purified on CD14<sup>+</sup> phenotype by MACS magnetic sorting from fresh buffy coat of healthy donors and cultured for 7 days with GM-CSF (100 ng/ml) and IL-4 (50 ng/ml) to yield *in vitro* generated moDC. (a) Gating strategy. (b) Flow cytometry histograms depicting the expression of indicated markers on the indicated populations. (c) *In vitro* generated moDC were co-cultured with activated (a) or naïve (n)CD4<sup>+</sup> T-cells or combined PRR stimuli. Flow cytometry histograms depict the expression of indicated markers. FMO results indicated that the high CD70 signal was due to auto-fluorescence. Data are representative of two independent experiments (n=2). (d) cDC1 as a positive control and moDC as test population were incubated with activated (a)- or naïve (n)-CD4<sup>+</sup> T-cells and entered in the priming system with MART-1<sub>15-40</sub> long peptide or dead Mel AAT cell debris. (e) Flow cytometry plots depicting MART-1-specific CD8<sup>+</sup> T-cell proliferation based on CTV dilution (left panel) and CTL differentiation based on intracellular Granzyme B staining (right panel). (f) Quantification of the % MART-1<sub>26-35</sub>/HLA-A2-specific (tetramer<sup>+</sup>) cells within CTV-negative (-) CD8<sup>+</sup> T-cells (upper panel) and the % Granzyme B<sup>+</sup> cells among CD8<sup>+</sup> T-cells (lower panel) under indicated conditions. Data are pooled from two independent experiments (n=2).



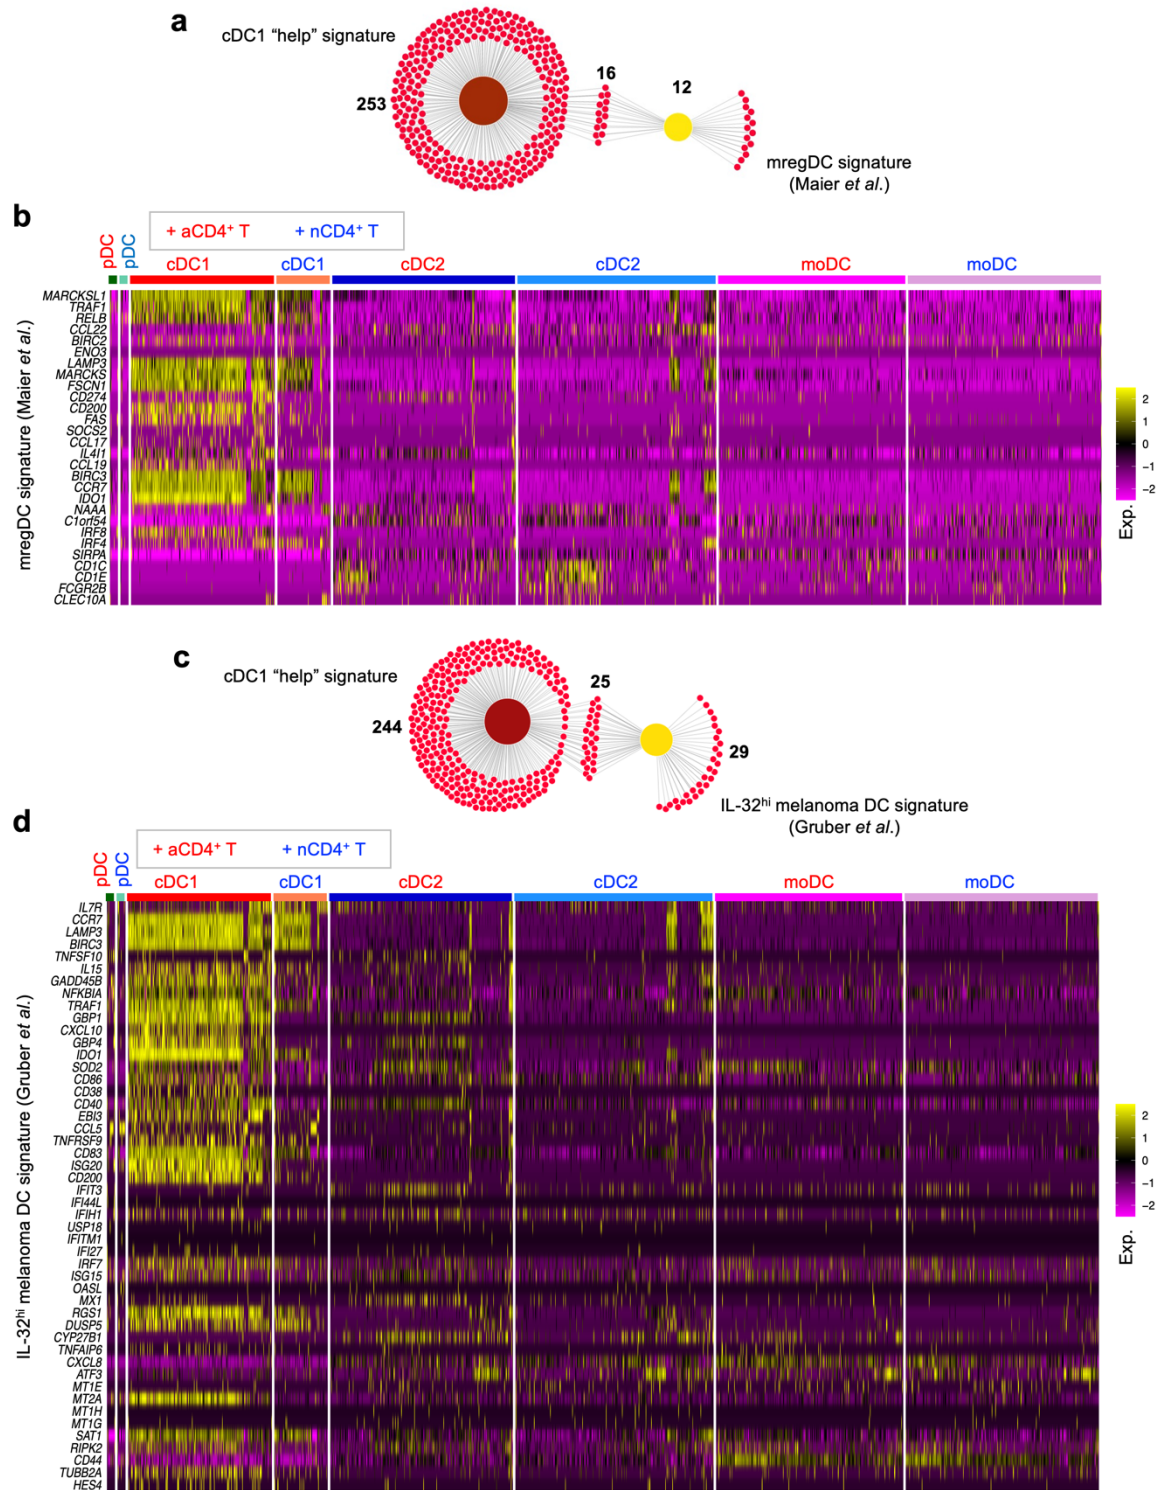

**Supplementary Fig. 11. cDC1 help signature is related to tumor-infiltrating mregDC signature and mature DC signature in the IL-32<sup>hi</sup> TME.** Tumor-infiltrating mregDC<sup>32</sup> and mature DC signature in the IL-32<sup>hi</sup> TME<sup>33</sup> were overlaid with cDC1 help signature. (a) Venn diagram depicting numbers of overlapping genes between the cDC1 help signature and tumor-infiltrating mregDC signature. (b) Heatmaps depicting expression of the tumor-infiltrating mregDC signature genes in each of our *ex vivo* DC subsets after co-culture with activated (a) or naïve (n) CD4<sup>+</sup> T cells. (c) Venn diagram depicting numbers of overlapping genes between the cDC1 help signature and the IL-32<sup>hi</sup> TME DC signature. (d) Heatmaps depicting expression of the IL-32<sup>hi</sup> melanoma DC signature genes in each of our *ex vivo* DC subsets after co-culture with activated (a) or naïve (n) CD4<sup>+</sup> T cells.



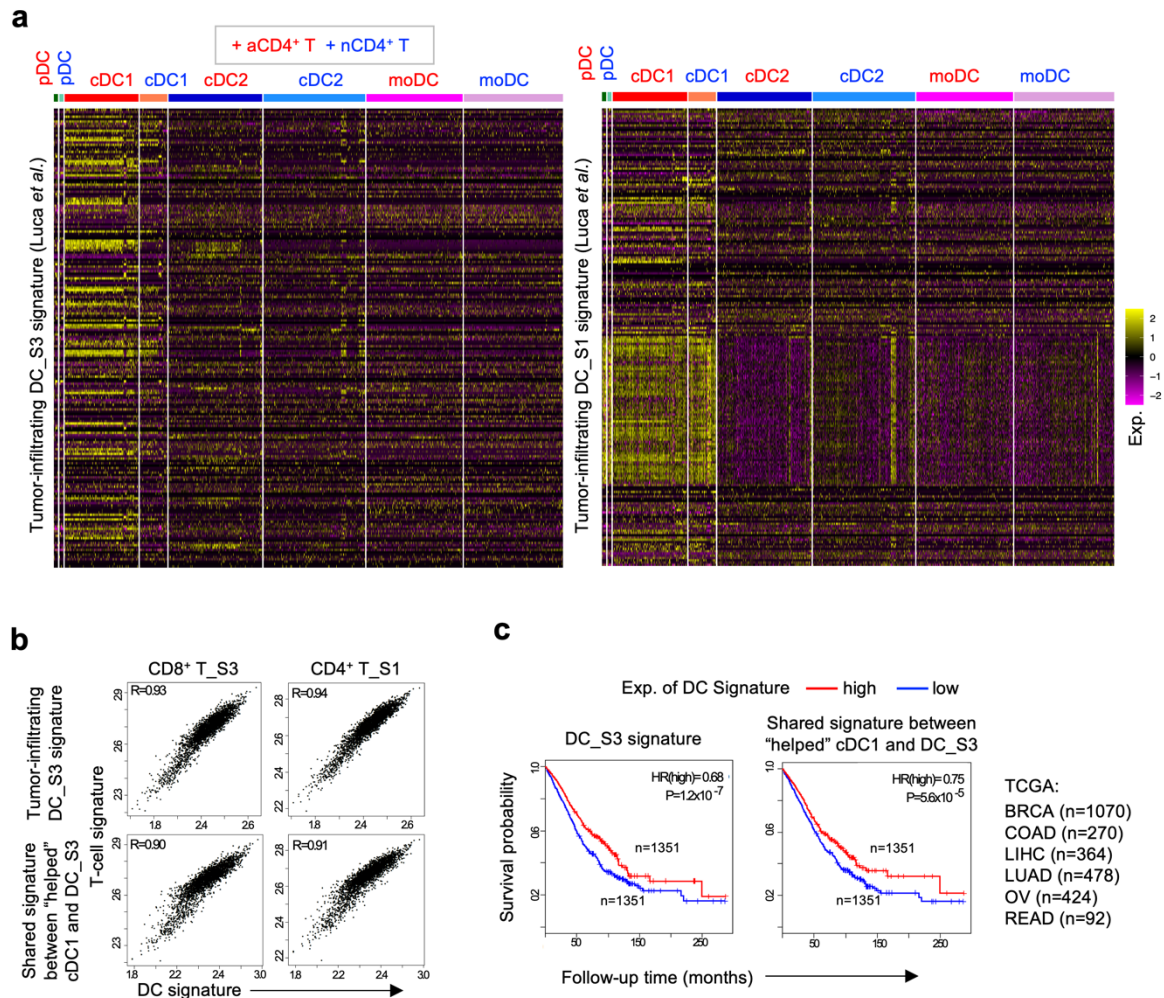

**Supplementary Figure 12. Relationship between cDC1 help signature and tumor-infiltrating DC\_S3 signature.** Signature genes of 8 tumor-infiltrating DC states<sup>18</sup> were cross-compared with the cDC1 help signature. (a) Heatmaps depicting the expression of signature genes of tumor-infiltrating DC\_S3 (222 genes) or DC\_S1 (217 genes) in each of our ex vivo DC subsets co-cultured with activated (a) or naïve (n) CD4<sup>+</sup> T cells. (b) Pearson's correlations between tumor-infiltrating DC\_S3 signature (upper panel), or shared signature between "helped" cDC1 and tumor-infiltrating DC\_S3 (lower panel) and tumor infiltrating T-cell signatures from CE9 (CD8<sup>+</sup> T\_S3, CD4<sup>+</sup> T\_S1)). (c) Kaplan-Meier curves revealing overall prognostic/predictive impact of tumor-infiltrating DC\_S3 signature (left), or shared signature between "helped" cDC1 and tumor-infiltrating DC\_S3 (right) on patient's overall survival in TCGA BRCA, COAD, LIHC, LUAD, OV and READ cohorts (n=2702). High or low metagene expression subgroups of patients were based on a median expression cut-off. p-value was calculated using Log-rank test/Mantel-Cox test (statistical-significance threshold of  $p < 0.05$ ).
